# Supplementary material
Source: HighWire-hosted journal article supplement (https://msphere.asm.org/content/3/6/e00582-18)
Supplement: inline-supplementary-material-7 [file inline-supplementary-material-7.pdf]

CsrB3 ---ACATT**TGTAAGAGATCTCTCACA**CCGAACGTAAGAGATCACAGTCAAG-CTTCGCAG  
 CsrB4 --CCACTT**TGTGCGAGATCTCTCACA**CGTGGTGTGCGACTAAGTCACTTTA-AATCGATG  
 CsrB1 ---TGGCT**TGTGAGAGATCTCTTACA**AAGGCTGTGAGATAACACAAACACATCGCTAGAG  
 CsrB2 CGCTGCCT**TGTGCGAGATCTCTCACA**-AGGTAGTGAGTAAATATCGATATT-TGATGACG  
 \*\*\*\*\* \*\*\*\*\* \*\*\* \*\* \*

CsrB3 AAA-----AAAGAAAAATTACAAACCCAACCCCTTGTTTTATATGAATCCACGCATAT  
 CsrB4 AAATCGTCTTAAAAATAAACCTAAGTTACTGAT-----TT-----TAT  
 CsrB1 AGATTGATGTGCATATGATTAAGGTGTTGAAT-----TT-----TAA  
 CsrB2 AAATTAGT---CACCTAGATATCGTAACCAAT-----TGAAATAAAAACGATACGTACAT  
 \* \* \* \* \*

CsrB3 TTATTT-----TAGTTAGCGAGGATATTTATTTCCCTAAGGCTAA---  
 CsrB4 TTGTTTGTGTGTTTGTGGGCGTATTTCTCACCTGAAA----TGTTTTTTGGGACTGT---  
 CsrB1 TTGTTT-----TATATAATTAACA----ACTTTCTTGAATTCAAAAT  
 CsrB2 TTATCA-----TTCAATAATTATATAGAA----ATTCGCTTATGCACCA---  
 \*\* \* \* \* \*

-35 -10 +1

CsrB3 -----TTGCGAATAAAGCCTCCAAA-GTGTTTAATACTCAT**GTCGACAGGGA**  
 CsrB4 -----CTAGGAAACTCGCCCAAATACCGTAATATTTAACT-**TGTCGACAGGGA**  
 CsrB1 GTGATGCAAATCTATTGTCCGAAATCCTAAATCGCGTAAATTAACCT-**TGTCGGAAGGAT**  
 CsrB2 -----TTGCTGATAAATAAGGAATCGGTAATATGAATGG-**TGTCGGAAGGAT**  
 \* \*\* \* \*\*\*\*\* \*\*\*
